# Supplementary material for: Human Metastatic Cholangiocarcinoma Patient-Derived Xenografts and Tumoroids for Preclinical Drug Evaluation
Source: Oxford University Press journal article supplement (doi:10.1158/1078-0432.ccr-22-2551), 2022-11-14
Supplement: ccr-22-2551_supplementary_table_s1_suppts1.xlsx [file ccr-22-2551_supplementary_table_s1_suppts1.xlsx]

## Sheet: Sheet1
Supplementary Table S1. Genomic alterations and gene fusions included in the VHIO-300 panel
Genomic alterations
ABL1	CYLD	H3F3C	MYCN	RBM10
ABL2	DAXX	HGF	MYD88	RECQL4
ACVR1B	DCUN1D1	HIST1H1C	MYH9	REL
AKAP9	DDR2	HIST1H2BD	MYOD1	RET
AKT1	DICER1	HIST1H3B	NBN	RFWD2
AKT2	DIS3	HNF1A	NCOR1	RHEB
AKT3	DNMT1	HRAS	NF1	RHOA
ALK	DNMT3A	HSD3B1	NF2	RICTOR
ALOX12B	DNMT3B	HSP90AA1	NFE2L2	RIT1
AMER1	DOT1L	ICOSLG	NFKBIA	RNF43
APC	E2F3	IDH1	NKX2-1	RNPC3
AR	EED	IDH2	NKX3-1	ROS1
ARAF	EGFL7	IFNGR1	NOTCH1	RPS6KA4
ARFRP1	EGFR	IGF1	NOTCH2	RPS6KB2
ARID1A	EIF1AX	IGF1R	NOTCH3	RPTOR
ARID1B	EP300	IGF2	NOTCH4	RSPO2
ARID2	EPCAM	IKBKE	NPM1	RUNX1
ARID5B	EPHA3	IKZF1	NRAS	RUNX1T1
ASXL1	EPHA5	IL10	NSD1	RYBP
ASXL2	EPHA7	IL7R	NTRK1	SDHA
ATM	EPHB1	INHBA	NTRK2	SDHAF2
ATR	ERBB2	INPP4A	NTRK3	SDHB
ATRX	ERBB3	INPP4B	NUP93	SDHC
AURKA	ERBB4	INSR	PAK1	SDHD
AURKB	ERCC2	IRAK4	PAK3	SETD2
AXIN1	ERCC3	IRF2	PAK7	SF3B1
AXIN2	ERCC4	IRF4	PALB2	SH2D1A
AXL	ERCC5	IRS1	PARK2	SHH
B2M	ERG	IRS2	PARP1	SHQ1
BAP1	ERRFI1	JAK1	PAX5	SLIT2
BARD1	ESR1	JAK2	PBRM1	SMAD2
BBC3	ETV1	JAK3	PDCD1	SMAD3
BCL2	ETV6	JUN	PDCD1LG2	SMAD4
BCL2L1	EXOSC10	KAT6A	PDGFRA	SMARCA4
BCL2L11	EZH2	KDM5A	PDGFRB	SMARCB1
BCL2L2	FAM175A	KDM5C	PDK1	SMARCD1
BCL6	FAM46C	KDM6A	PDPK1	SMO
BCOR	FANCA	KDR	PHOX2B	SNCAIP
BCORL1	FANCC	KEAP1	PIK3C2B	SOCS1
BLM	FANCD2	KEL	PIK3C2G	SOX10
BMPR1A	FANCE	KIT	PIK3C3	SOX17
BRAF	FANCF	KLF4	PIK3CA	SOX2
BRCA1	FANCG	KLHL6	PIK3CB	SOX9
BRCA2	FANCL	KMT2A	PIK3CD	SPEN
BRD4	FANCM	KMT2C	PIK3CG	SPOP
BRIP1	FAS	KMT2D	PIK3R1	SPTA1
BTG1	FAT1	KRAS	PIK3R2	SRC
BTK	FBXW7	LATS1	PIK3R3	STAG2
C11ORF30	FGF10	LATS2	PIM1	STAT3
CARD11	FGF14	LIFR	PLCG2	STAT4
CASP8	FGF19	LMO1	PLK2	STK11
CBFB	FGF23	LRP1B	PMAIP1	STK40
CBL	FGF3	LYN	PMS1	SUFU
CCND1	FGF4	LZTR1	PMS2	SUZ12
CCND2	FGF6	MAD2L2	PNRC1	SYK
CCND3	FGFR1	MAGI2	POLD1	TAF1
CCNE1	FGFR2	MALT1	POLE	TBX3
CD274	FGFR3	MAP2K1	POLR3A	TERT
CD276	FGFR4	MAP2K2	POLR3B	TET1
CD79A	FH	MAP2K4	PPP2R1A	TET2
CD79B	FLCN	MAP3K1	PPP2R2A	TGFBR1
CDC73	FLT1	MAP3K13	PRDM1	TGFBR2
CDH1	FLT3	MAP3K5	PREX2	TMEM127
CDK12	FLT4	MAPK1	PRKAR1A	TMPRSS2
CDK4	FOXA1	MAPK7	PRKCI	TNFAIP3
CDK6	FOXL2	MAX	PRKDC	TNFRSF14
CDK8	FOXP1	MCL1	PRSS8	TOP1
CDKN1A	FRS2	MDC1	PTCH1	TOP2A
CDKN1B	FUBP1	MDM2	PTEN	TP53
CDKN2A	GABRA6	MDM4	PTPN11	TP63
CDKN2B	GATA1	MED12	PTPRD	TRAF7
CDKN2C	GATA2	MEF2B	PTPRS	TSC1
CEBPA	GATA3	MEN1	PTPRT	TSC2
CHD2	GATA4	MET	QKI	TSHR
CHD4	GATA6	MITF	RAC1	U2AF1
CHEK1	GID4	MLH1	RAD50	VEGFA
CHEK2	GLI1	MLH3	RAD51	VHL
CIC	GNA11	MPL	RAD51B	VTCN1
CREBBP	GNA13	MRE11A	RAD51C	WISP3
CRKL	GNAQ	MSH2	RAD51D	WT1
CRLF2	GNAS	MSH3	RAD52	XIAP
CSF1R	GPR124	MSH6	RAD54L	XPO1
CTCF	GREM1	MTOR	RAF1	YAP1
CTLA4	GRIN2A	MUTYH	RANBP2	YES1
CTNNA1	GRM3	MYC	RARA	ZBTB2
CTNNB1	GSK3B	MYCL	RASA1	ZNF217
CUL3	H3F3A	MYCL1	RB1	ZNF703
Gene fusions:
Chromosome	Gene	Intron number
2	ALK	NM_004304: intron_19
5	CD74	NM_013230: intron_6
7	EGFR	NM_005228: intron_7
2	EML4	NM_019063: intron_6
2	EML4	NM_019063: intron_13
8	FGFR1	NM_001174067: introns_16_17
10	FGFR2	NM_000141: intron_17
4	FGFR3	NM_000142: intron_17
5	NPM1	NM_002520: intron_5
1	NTRK1	NM_002529: intron 9
10	RET	NM_020975: intron_11
6	ROS1	NM_002944: intron_33
4	TACC3	NM_006342: intron_9
