# Supplementary material for: Human Metastatic Cholangiocarcinoma Patient-Derived Xenografts and Tumoroids for Preclinical Drug Evaluation
Source: Oxford University Press journal article supplement (doi:10.1158/1078-0432.ccr-22-2551), 2022-11-14
Supplement: ccr-22-2551_supplementary_table_s2_suppts2.xlsx [file ccr-22-2551_supplementary_table_s2_suppts2.xlsx]

## Sheet: CLINICAL RECORDS
Supplementary Table S2. Information of patient underwent the biopsy procedures.
Patient Code	Patient Gender	Race	Pathologic subtypes	Biopsy timing	Biopsy site	Biopsy method	Age at biopsy	Number of months from implantation to the obeservation of tumor growth	PDX (YES/NO)	PDX CODE
Patient-1	Male	Caucasian	extrahepatic	after 1st line	Liver Metastasis	Ultrasoud-guided core biopsy	76	-	NO	-
Patient-2	Female	Caucasian	extrahepatic	after 2nd line	Liver Metastasis	Ultrasoud-guided core biopsy	58	4.7	YES	PDX41
Patient-3	Female	Caucasian	extrahepatic	after 3rd line	Liver Metastasis	Ultrasoud-guided core biopsy	59	-	NO	-
Patient-4	Male	Caucasian	intrahepatic	after 2nd line	Liver Metastasis	Ultrasoud-guided core biopsy	74	7.3	YES	PDX58
Patient-5	Male	Caucasian	Intrahepatic	after 2nd line	Liver Metastasis	Ultrasoud-guided core biopsy	68	2.36667	YES	PDX62
Patient-6	Male	Caucasian	intrahepatic	after 1st line	Liver Metastasis	Ultrasoud-guided core biopsy	58	-	NO	-
Patient-7	Female	Caucasian	intrahepatic	after 1st line	Liver Metastasis	Ultrasoud-guided core biopsy	62	-	NO	-
Patient-8	Male	Caucasian	intrahepatic	after 2nd line	Liver Metastasis	Ultrasoud-guided core biopsy	53	6.1	YES	PDX67
Patient-9	Female	Caucasian	intrahepatic	during 1st line	Liver Metastasis	Ultrasoud-guided core biopsy	69	-	NO	-
Patient-10	Female	Caucasian	intrahepatic	after 1st line	Liver Metastasis	Ultrasoud-guided core biopsy	69	4	YES	PDX68.2
Patient-11	Female	Caucasian	intrahepatic	after 1st line	Liver Metastasis	Ultrasoud-guided core biopsy	49	-	NO	-
Patient-12	Female	Caucasian	intrahepatic	after 1st line	Liver Metastasis	Ultrasoud-guided core biopsy	76	-	NO	-
Patient-13	Female	Caucasian	intrahepatic	after 2nd line	Liver Metastasis	Ultrasoud-guided core biopsy	76	-	NO	-
Patient-14	Female	Caucasian	intrahepatic	after 2nd line	Liver Metastasis	Ultrasoud-guided core biopsy	41	2	YES	PDX75
Patient-15	Female	Caucasian	intrahepatic	after 3rd line	Liver Metastasis	Ultrasoud-guided core biopsy	42	3.4	YES	PDX75.2
Patient-16	Female	Caucasian	intrahepatic	after 1st line	Liver Metastasis	Ultrasoud-guided core biopsy	70	-	NO	-
Patient-17	Female	Caucasian	intrahepatic	after 1st line	Liver Metastasis	Ultrasoud-guided core biopsy	79	4.7	YES	PDX78
Patient-18	Female	Caucasian	intrahepatic	after 2nd line	Liver Metastasis	Ultrasoud-guided core biopsy	59	-	NO	-
Patient-19	Male	Caucasian	intrahepatic	after 1st line	Liver Metastasis	Ultrasoud-guided core biopsy	68	-	NO	-
Patient-20	Male	Caucasian	intrahepatic	after 2nd line	Liver Metastasis	Ultrasoud-guided core biopsy	62	-	NO	-
Patient-21	Female	Caucasian	extrahepatic	after adjuvant treatment	Bile Duct Primaray	Biopsy during surgery	72	5.2	YES	PDX84
Patient-22	Female	Caucasian	intrahepatic	after 3rd line	Liver Metastasis	Ultrasoud-guided core biopsy	66	4.7	YES	PDX85
Patient-23	Male	Caucasian	intrahepatic	after 3rd line	Liver Metastasis	Ultrasoud-guided core biopsy	49	-	NO	-
Patient-24	Male	Caucasian	intrahepatic	during 1st line	Liver Metastasis	Ultrasoud-guided core biopsy	60	-	NO	-
Patient-25	Male	Caucasian	intrahepatic	after 2nd line	Liver Metastasis	Ultrasoud-guided core biopsy	49	-	NO	-
Patient-26	Female	Caucasian	intrahepatic	during 1st line	Liver Metastasis	Ultrasoud-guided core biopsy	64	-	NO	-
Patient-27	Male	Caucasian	intrahepatic	after 2nd line	Metastasis supraclavicular lymph nodes	Ultrasoud-guided core biopsy	49	7	YES	PDX96
Patient-28	Female	Caucasian	intrahepatic	after 2nd line	Liver Metastasis	Ultrasoud-guided core biopsy	76	-	NO	-
Patient-29	Female	Caucasian	intrahepatic	after 3rd line	Liver Metastasis	Ultrasoud-guided core biopsy	77	-	NO	-
Patient-30	Male	Caucasian	intrahepatic	after 3rd line	Liver Metastasis	Ultrasoud-guided core biopsy	71	4.9	YES	PDX104
Patient-31	Female	Caucasian	intrahepatic	after 3rd line	Peritoneal Metastasis	Ultrasoud-guided core biopsy	74	-	NO	-
Patient-32	Female	Caucasian	intrahepatic	after 2nd line	Liver Metastasis	Ultrasoud-guided core biopsy	64	-	NO	-
Patient-33	Female	Caucasian	intrahepatic	after 1st line	Liver Metastasis	Ultrasoud-guided core biopsy	45	-	NO	-
Patient-34	Male	Caucasian	intrahepatic	after 1st line	Liver Metastasis	Ultrasoud-guided core biopsy	48	-	NO	-
Patient-35	Female	Caucasian	intrahepatic	after 2nd line	Liver Metastasis	Ultrasoud-guided core biopsy	77	7.5	YES	PDX118
Patient-36	Male	Caucasian	extrahepatic	after adjuvant treatment	Liver Metastasis	Ultrasoud-guided core biopsy	56	3.1	YES	PDX119
Patient-37	Male	Caucasian	extrahepatic	after adjuvant treatment	Liver Metastasis	Ultrasoud-guided core biopsy	53	2.2	YES	PDX120
Patient-38	Female	Caucasian	intrahepatic	during 1st line	Liver Metastasis	Ultrasoud-guided core biopsy	57	6.8	YES	PDX123
Patient-39	Female	Caucasian	intrahepatic	treatment naive	Liver Metastasis	Ultrasoud-guided core biopsy	58	-	NO	-
Patient-40	Female	Caucasian	intrahepatic	treatment naive	Liver Metastasis	Ultrasoud-guided core biopsy	68	-	NO	-
Patient-41	Female	Caucasian	intrahepatic	treatment naive	Liver Metastasis	Ultrasoud-guided core biopsy	55	-	NO	-
Patient-42	Male	Caucasian	intrahepatic	treatment naive	Liver Metastasis	Ultrasoud-guided core biopsy	73	-	NO	-
Patient-43	Male	Caucasian	intrahepatic	after 3rd line	Liver Metastasis	Ultrasoud-guided core biopsy	48	6.6	YES	PDX132
Patient-44	Female	Caucasian	intrahepatic	during 1st line	Liver Metastasis	Ultrasoud-guided core biopsy	43	1.9	YES	PDX133
Patient-45	Female	Caucasian	intrahepatic	after 1st line	Liver Metastasis	Ultrasoud-guided core biopsy	48	-	NO	-
Patient-46	Male	Caucasian	intrahepatic	after 2nd line	Liver Metastasis	Ultrasoud-guided core biopsy	52	-	NO	-
Patient-47	Female	Caucasian	intrahepatic	after 1st line	Liver Metastasis	Ultrasoud-guided core biopsy	46	3	YES	PDX345
Patient-48	Female	Caucasian	intrahepatic	after 1st line	Liver Metastasis	Ultrasoud-guided core biopsy	40	-	NO	-
Patient-49	Female	Caucasian	intrahepatic	after 3rd line	Liver Metastasis	Ultrasoud-guided core biopsy	49	-	NO	-
